# Supplementary material for: Regulating Fe-spin state by atomically dispersed Mn-N in Fe-N-C catalysts with high oxygen reduction activity
Source: PubMed Central journal article supplement (PMC7979714; doi:10.1038/s41467-021-21919-5), 2021-03-19
Supplement: 41467_2021_21919_MOESM1_ESM.pdf [file 41467_2021_21919_MOESM1_ESM.pdf]

## Supplementary Information

### **Regulating Fe-Spin State by Atomically Dispersed Mn-N in Fe-N-C Catalysts with High Oxygen Reduction Activity**

*Gege Yang,<sup>1</sup> Jiawei Zhu,<sup>2,5</sup> Pengfei Yuan,<sup>3</sup> Yongfeng Hu,<sup>4</sup> Gan Qu,<sup>1</sup> Bang-An Lu,<sup>1</sup> Xiaoyi Xue,<sup>1</sup> Hengbo Yin,<sup>1</sup> Wenzheng Cheng,<sup>1</sup> Junqi Cheng,<sup>1</sup> Wenjing Xu,<sup>1</sup> Jin Li,<sup>1</sup> Jinsong Hu,<sup>6</sup> Shichun Mu<sup>\*2,5</sup> and Jianan Zhang,<sup>\*1</sup>*

\*correspondence to: msc@whut.edu.cn; zjn@zzu.edu.cn

## Supplementary Figures and Tables

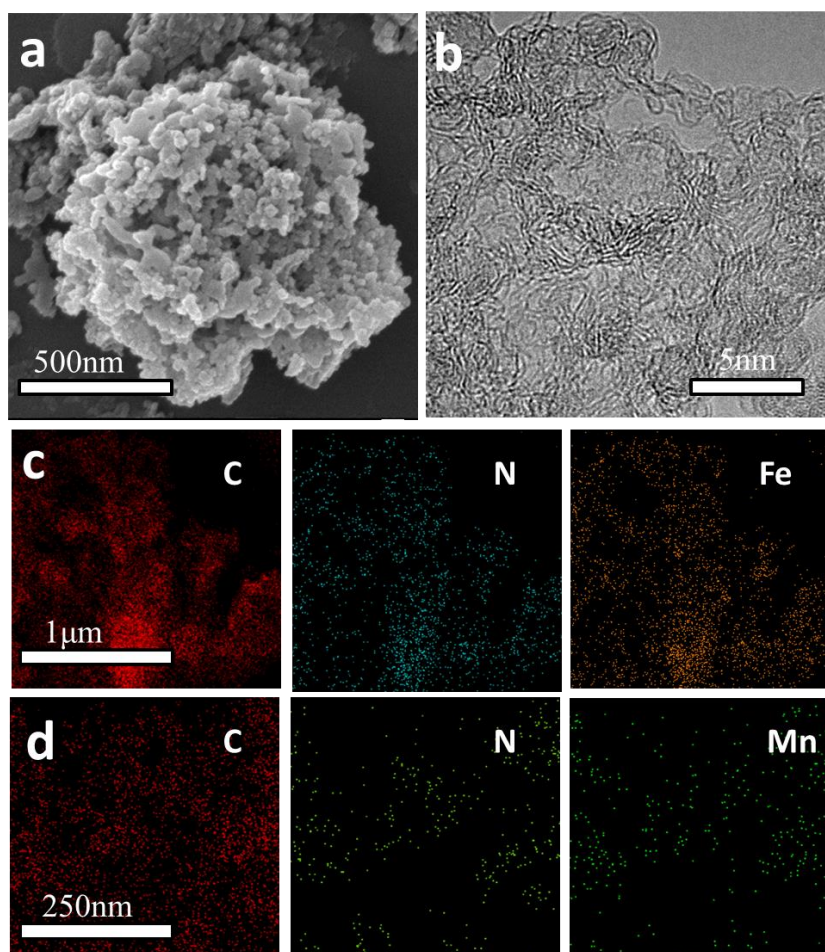

**Supplementary Figure 1:** SEM (a) and TEM (b) images of FeMn/N-C. EDS-mapping images of (c) Fe/N-C (d) Mn/N-C

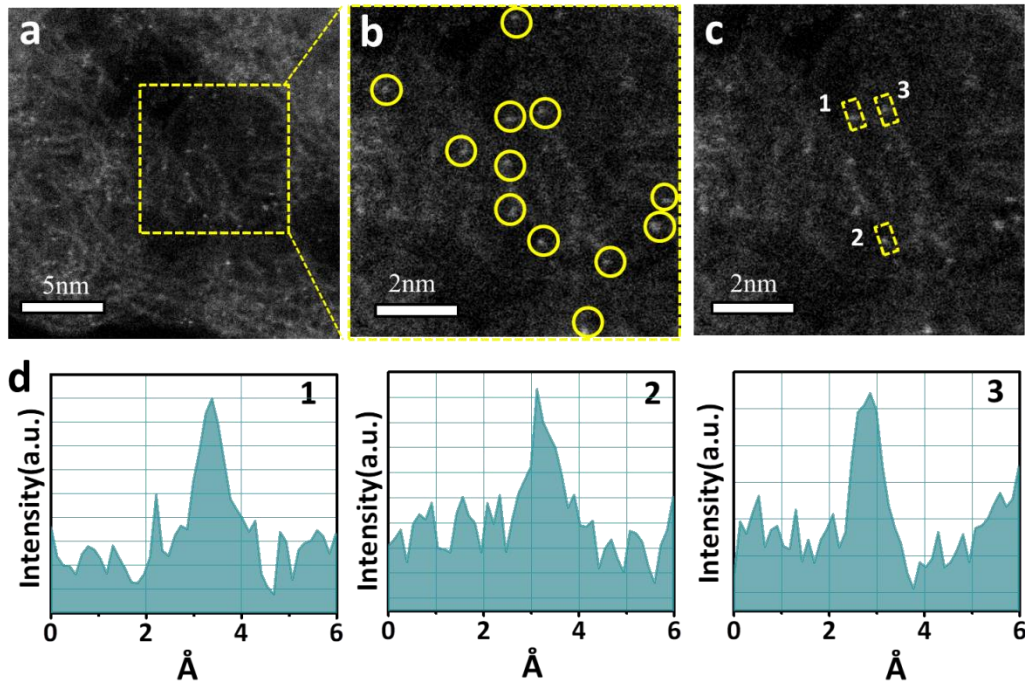

**Supplementary Figure 2:** (a) and (b) HAADF-STEM image of Fe/N-C. (c) and (d) Several single atoms have been highlighted and different intensity profiles have been obtained on them.

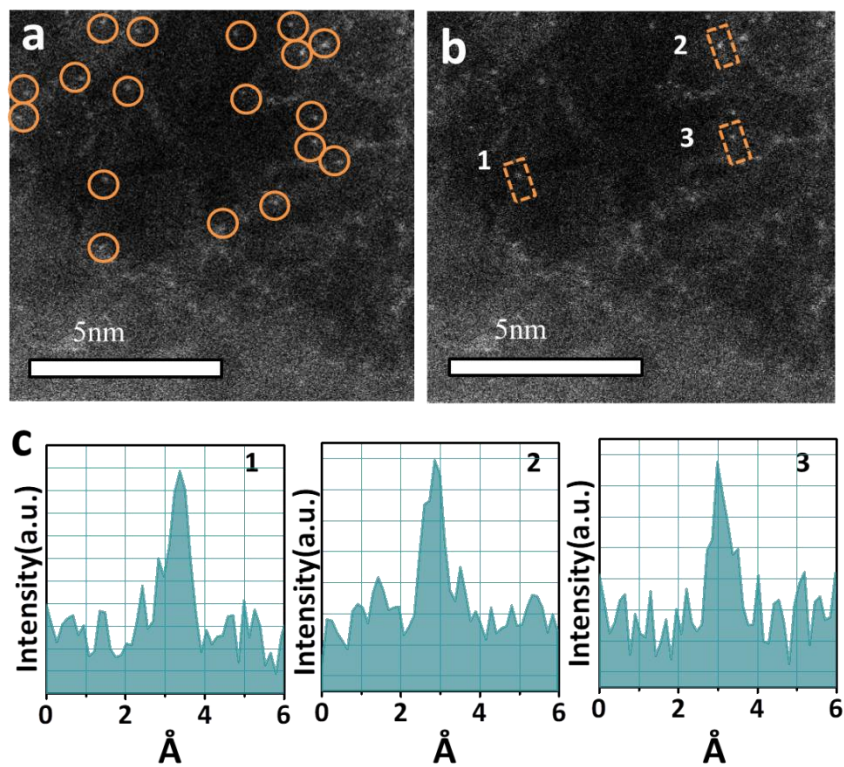

**Supplementary Figure 3:** (a) HAADF-STEM image of Mn/N-C. (b) and (c) Several single atoms have been highlighted and different intensity profiles have been obtained on them.

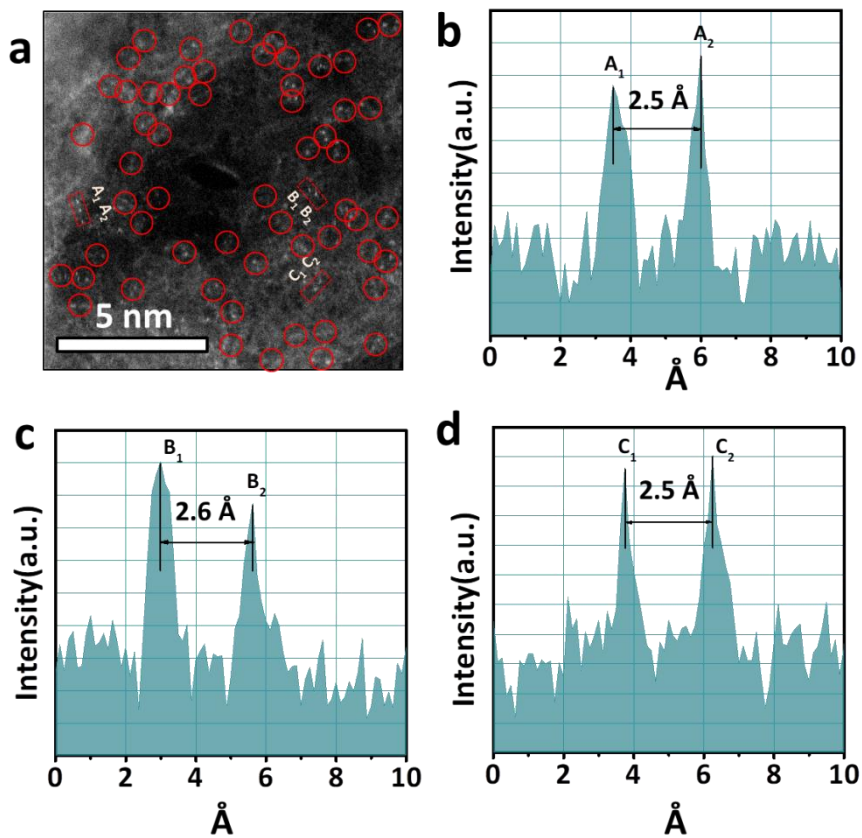

**Supplementary Figure 4:** (a-d) Several Fe-Mn dual atoms have been highlighted and different intensity profiles have been obtained on them

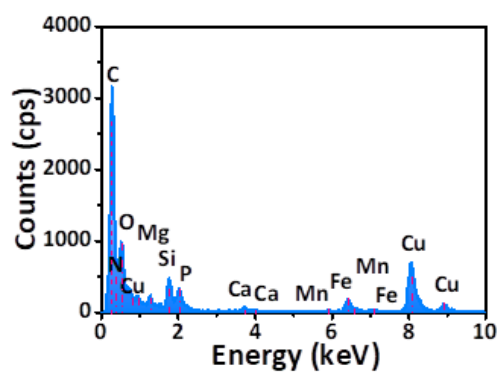

**Supplementary Figure 5:** Energy dispersive X-ray Spectroscopy image

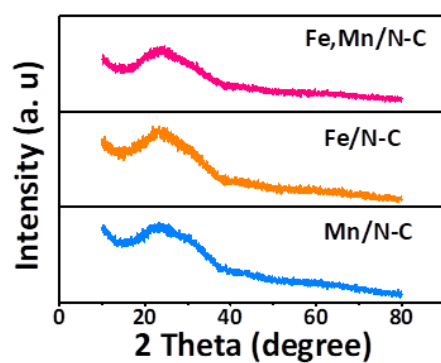

**Supplementary Figure 6:** XRD pattern of Fe,Mn/N-C, Fe/N-C and Mn/N-C

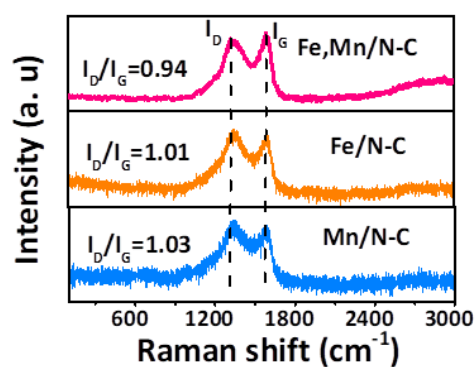

**Supplementary Figure 7:** Raman spectra of different samples

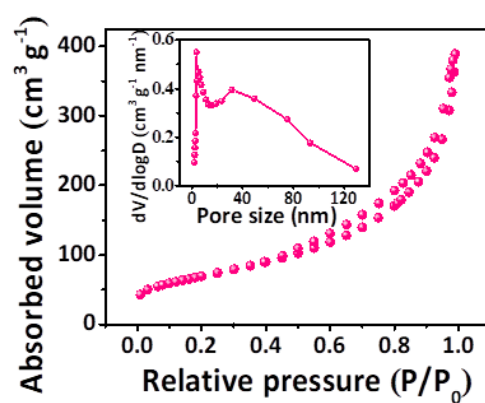

**Supplementary Figure 8:** N<sub>2</sub> adsorption/desorption isotherms of Fe,Mn/N-C, inset is pore size distribution of the Fe,Mn/N-C.

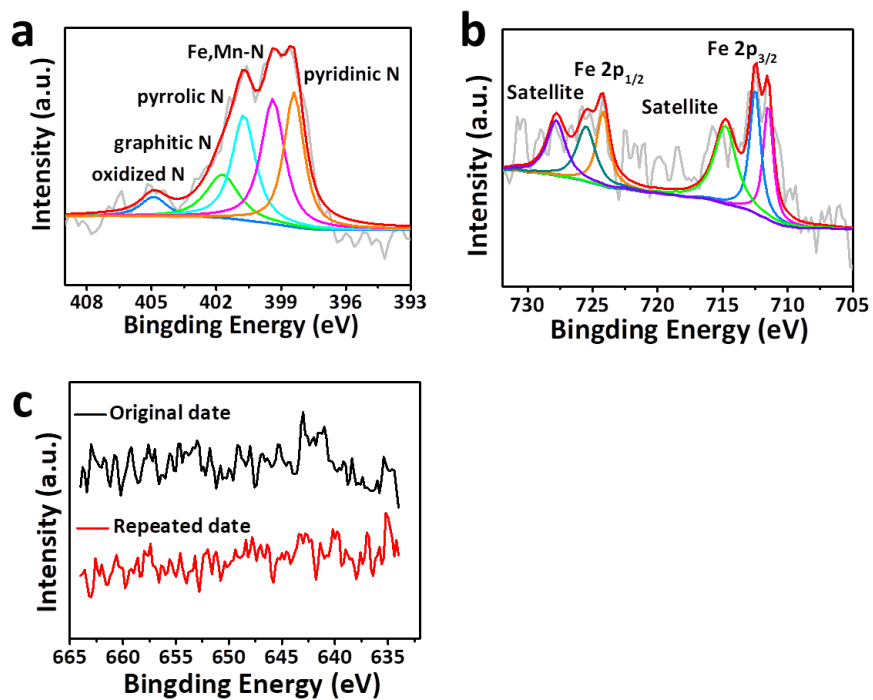

**Supplementary Figure 9:** (a) High-resolution N 1s spectrum of Fe,Mn/N-C, High-resolution XPS spectra for Fe 2p (b) and Mn 2p (c) for Fe,Mn/N-C.

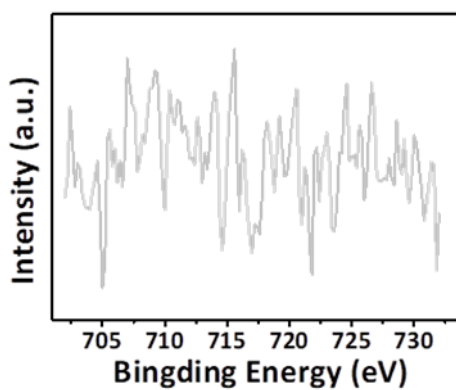

**Supplementary Figure 10:**High-resolution XPS spectra for Fe 2p for Fe/N-C.

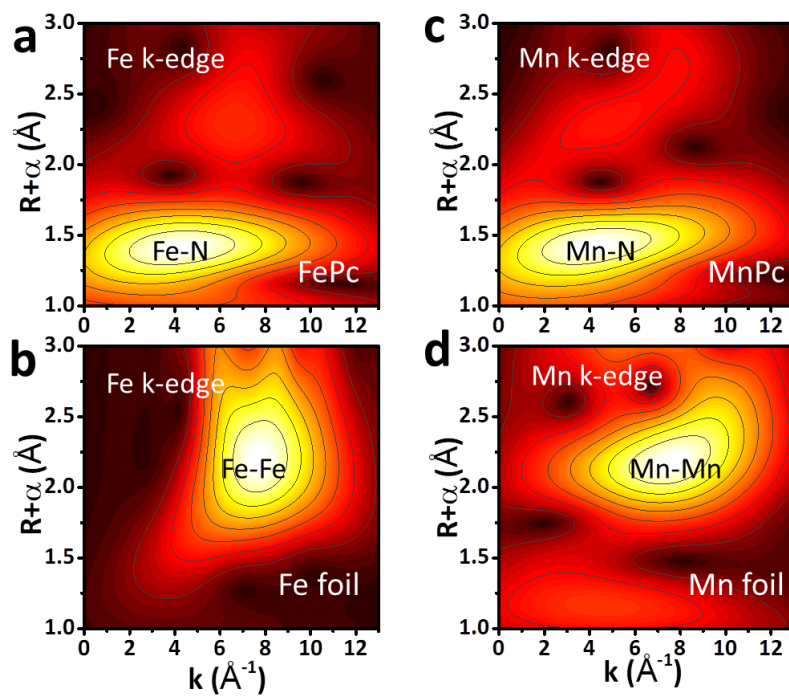

**Supplementary Figure 11:** Wavelet transform of the  $k^3$ -weighted EXAFS data of (a) FePc , Fe foil and (b)MnPc , Mn foil.



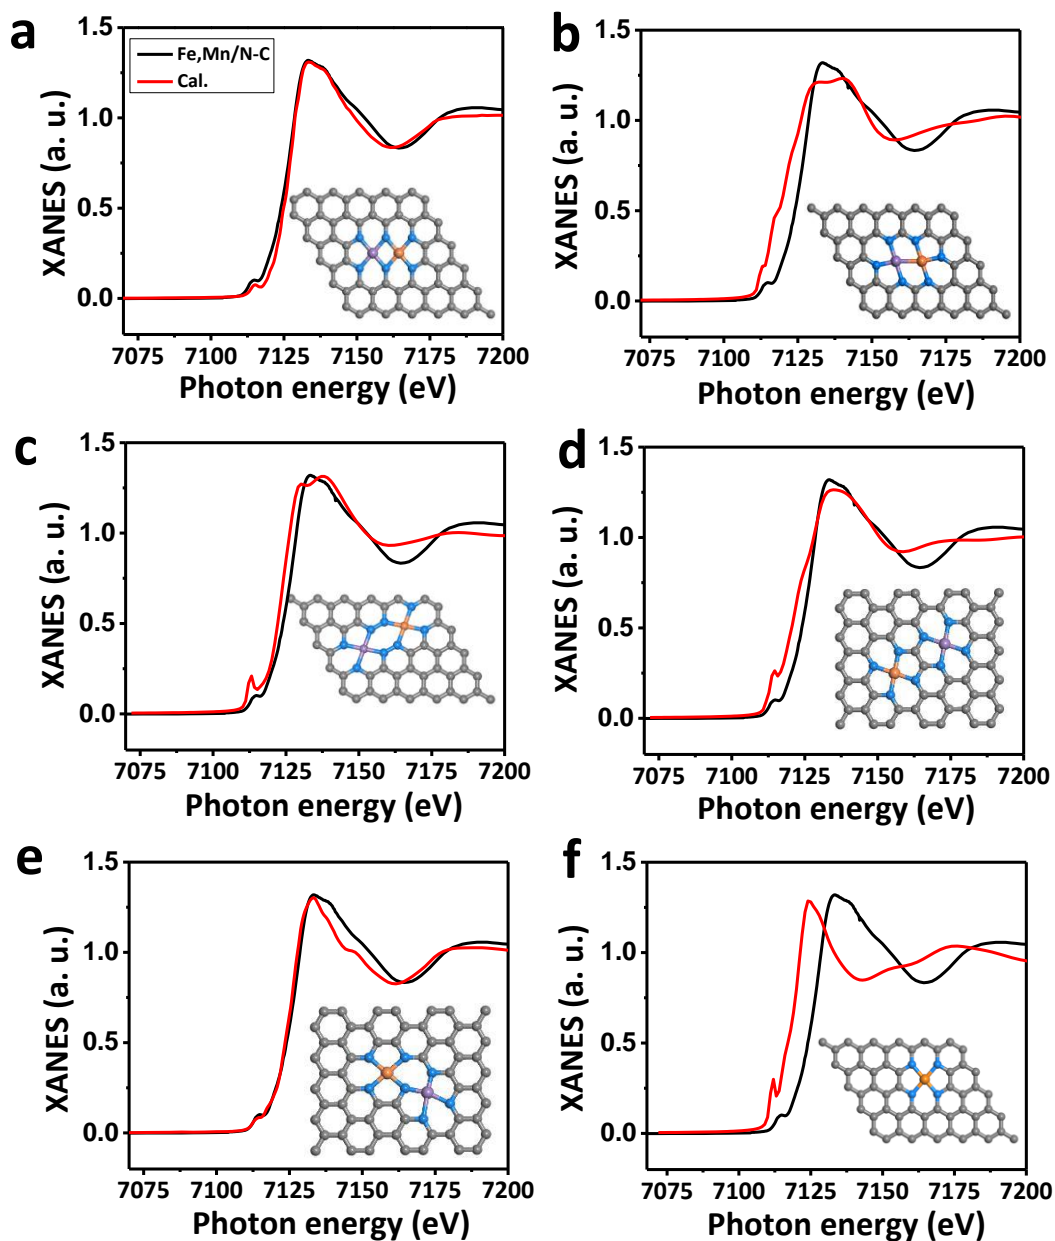

**Supplementary Figure 12:** Comparison between the K-edge XANES experimental spectra of Fe,Mn/N-C (black lines) and the theoretical spectra calculated with the depicted structures (red lines).

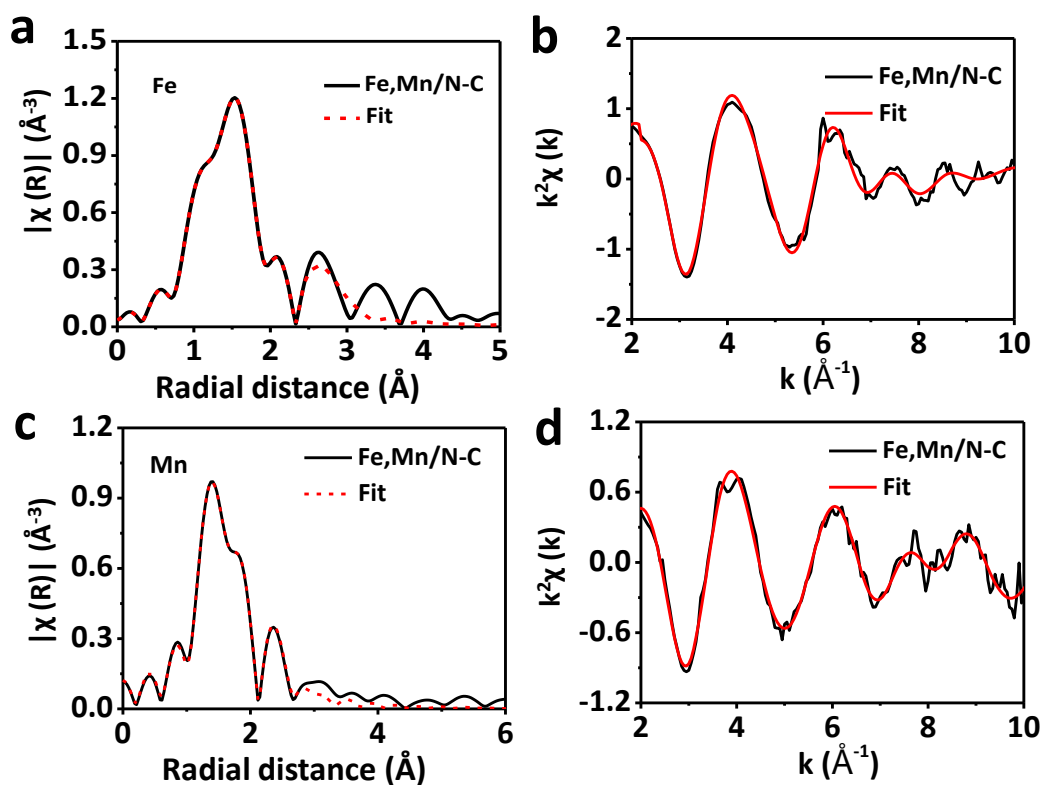

**Supplementary Figure 13:** (a, b) The Fe k-edge Fourier-transform EXAFS (a) and k space curves (b) of Fe,Mn/N-C and corresponding fitting curves. (c,d) The Mn k-edge Fourier-transform EXAFS (c) and k space curves (d) of of Fe,Mn/N-C and corresponding fitting curves

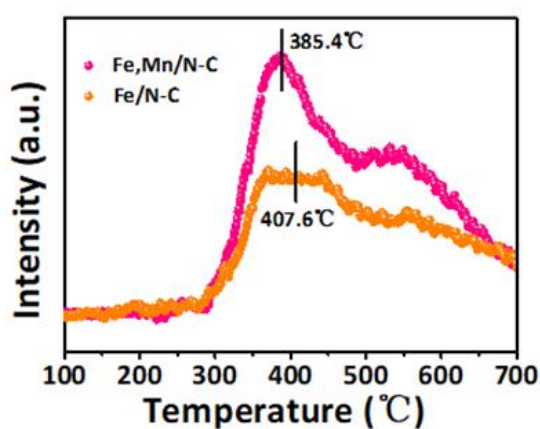

**Supplementary Figure 14:** O<sub>2</sub>-TPD of Fe/N-C and Fe,Mn/N-C.

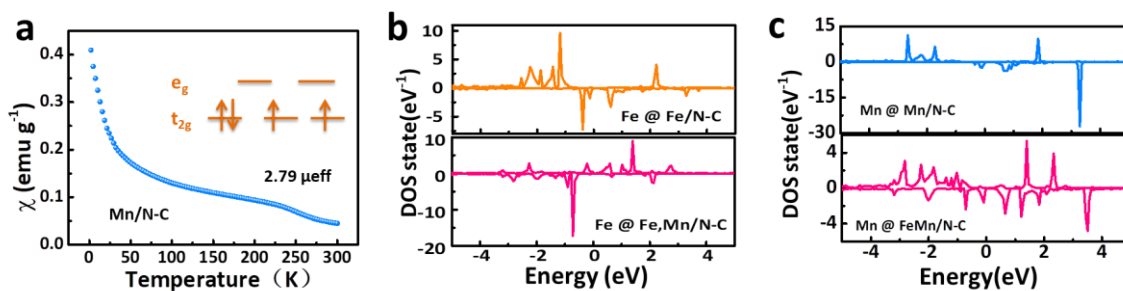

**Supplementary Figure 15:** (a) Magnetic susceptibility of Mn/N-C. (b) DOS of Fe@Fe/N-C and Fe@Fe,Mn/N-C. (c) DOS of Mn@Mn/N-C and Mn@Fe,Mn/N-C.

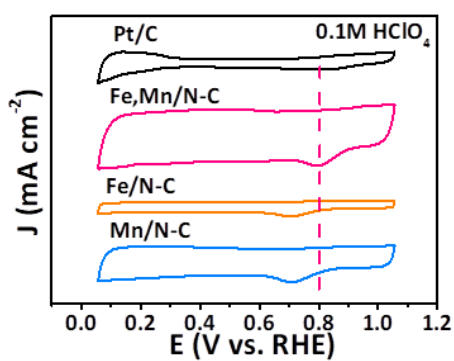

**Supplementary Figure 16:** CVs of Fe, Mn/N-C, Fe/N-C, Mn/N-C and Pt/C for ORR catalysis in 0.1M HClO<sub>4</sub>.

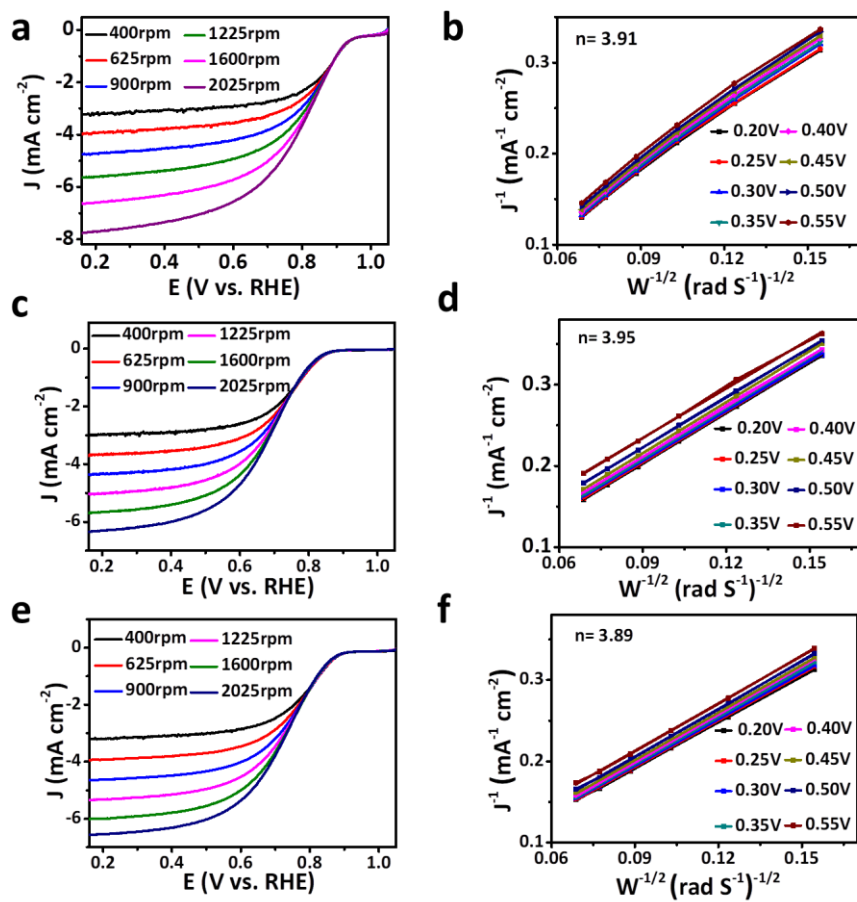

**Supplementary Figure 17:** LSV curves and K-L plots of (a. b) Fe,Mn/N-C, (c. d) Fe/N-C, (e. f) Mn/N-C in O<sub>2</sub>-saturated 0.1 M HClO<sub>4</sub> solution.

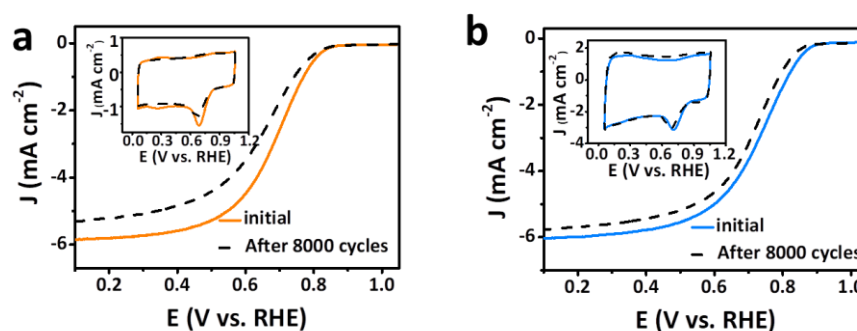

**Supplementary Figure 18:** ORR polarization LSV and CV curves of Fe/N-C (a) and Mn/N-C (b), measurement before and after 8000 potential cycles at the scan rate of 50 mV s<sup>-1</sup> with the rotation speed of 1600 rpm in 0.1M HClO<sub>4</sub>.

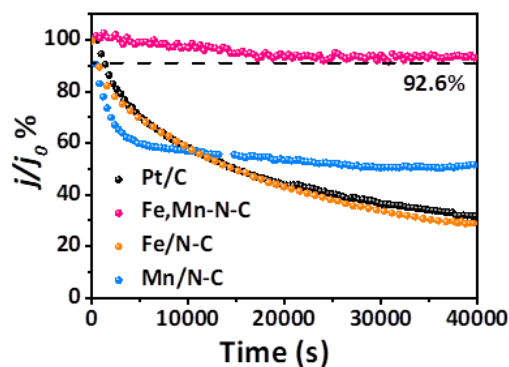

**Supplementary Figure 19:** The chronoamperometric response of Fe,Mn/N-C, Fe/N-C, Mn/N-C and Pt/C in an O<sub>2</sub>-saturated 0.1 M HClO<sub>4</sub> solution at a potential of 0.6 V.

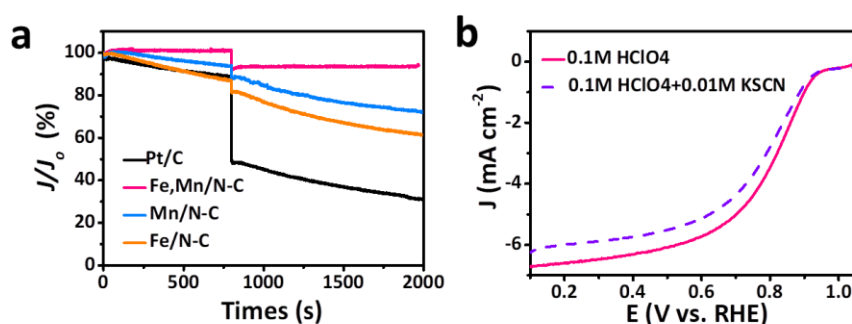

**Supplementary Figure 20:** (a) Chronoamperometric response for Fe,Mn/N-C, Fe/N-C, Mn/N-C and Pt/C electrode at 0.6 V (vs. RHE) after the introduction of 9.7 ml of CH<sub>3</sub>OH into 230.3 ml of 0.1M HClO<sub>4</sub> solution. (b) Poisoning experiments of Fe,Mn/N-C measured by RDE in an O<sub>2</sub>-saturated 0.1 M HClO<sub>4</sub> electrolyte with and without KSCN in the electrolyte.

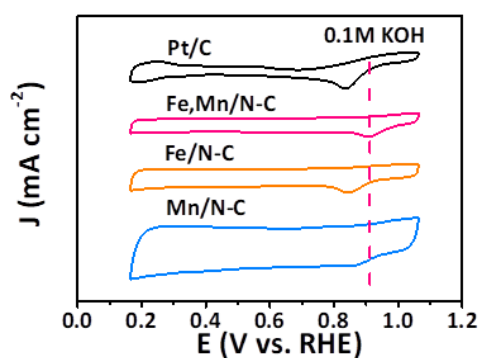

**Supplementary Figure 21:** CVs of Fe,Mn/N-C, Fe/N-C, Mn/N-C and Pt/C for ORR catalysis in 0.1M KOH.

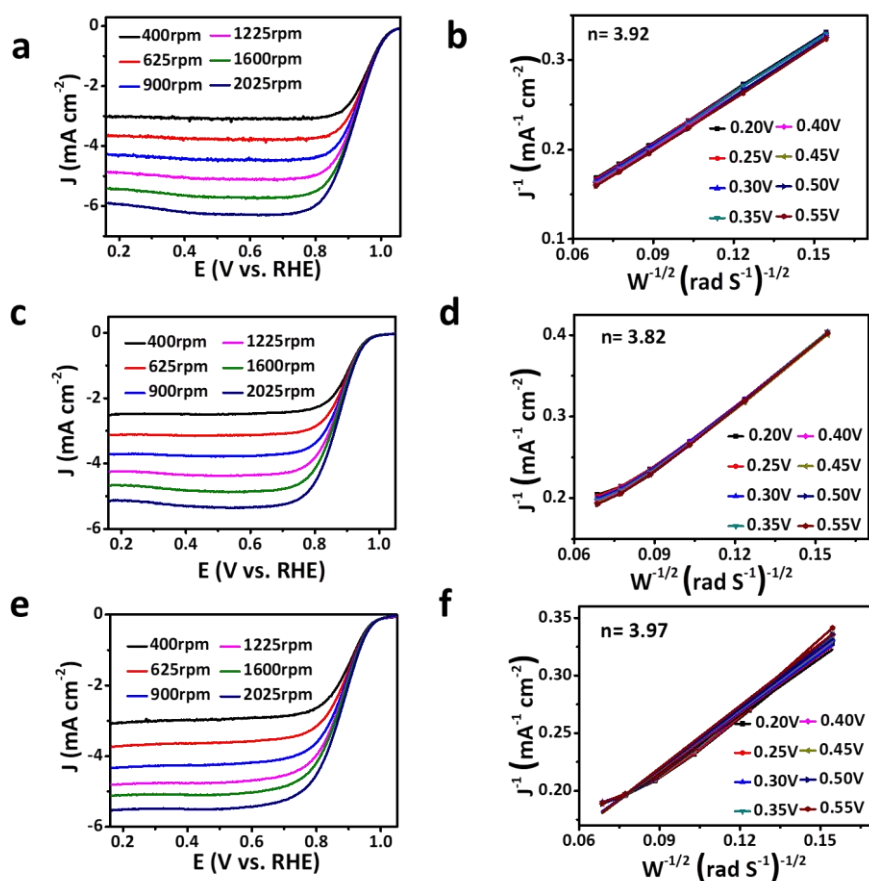

**Supplementary Figure 22:** LSV curves and K-L plots of (a. b) Fe,Mn/N-C, (c. d) Fe/N-C, (e. f) Mn/N-C in O<sub>2</sub>-saturated 0.1 M KOH solution.

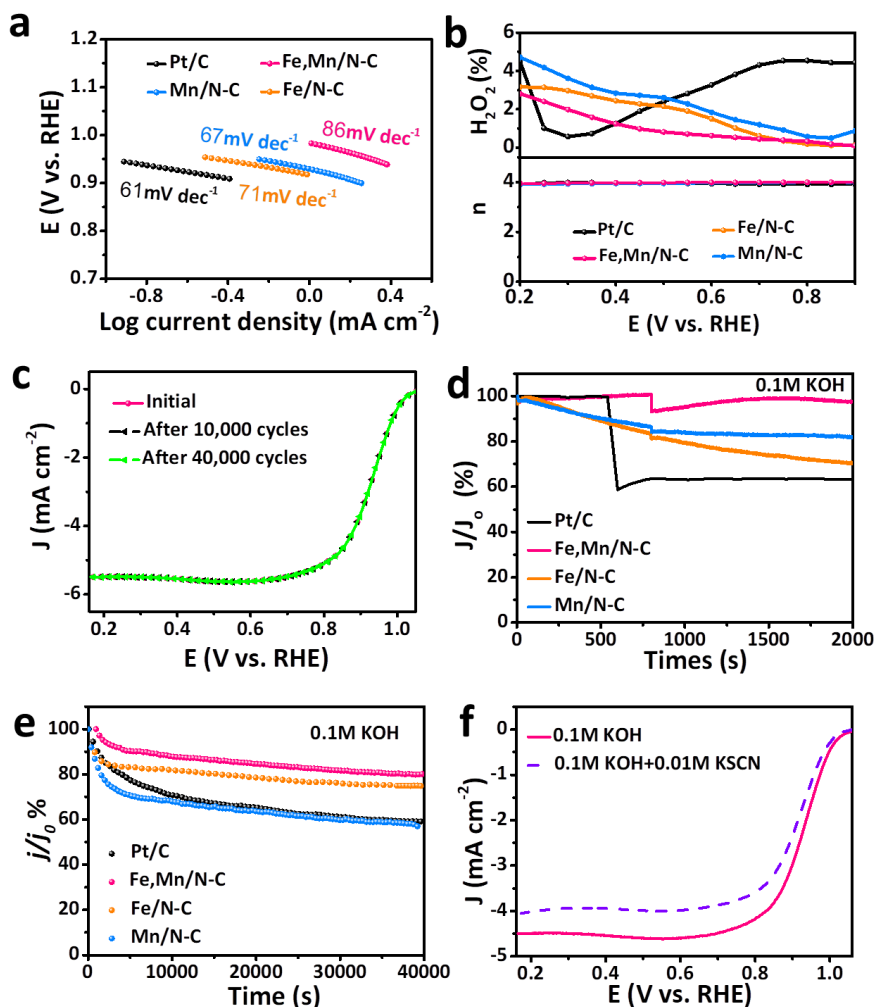

**Supplementary Figure 23:** (a) Corresponding Tafel plots obtained from the RDE polarization curves (b)  $\text{H}_2\text{O}_2$  yield and electron transfer number. (c) ORR polarization of Fe,Mn/N-C measurement before and after 10000 and 40000 potential cycles at the scan rate of  $50 \text{ mV s}^{-1}$  with the rotation speed of 1600 rpm. (d) The chronoamperometric response of Fe,Mn/N-C, Fe/N-C, Mn/N-C and Pt/C in an  $\text{O}_2$ -saturated 0.1 M KOH solution at a potential of 0.6V. (e) Chronoamperometric response for Fe,Mn/N-C, Fe/N-C, Mn/N-C and Pt/C electrode at 0.6 V (vs. RHE) after the introduction of 9.7 ml of  $\text{CH}_3\text{OH}$  into 230.3 ml of 0.1M KOH solution. (f) Poisoning experiments of Fe,Mn/N-C measured by RDE in an  $\text{O}_2$ -saturated 0.1 M  $\text{HClO}_4$  electrolyte with and without KSCN in the electrolyte

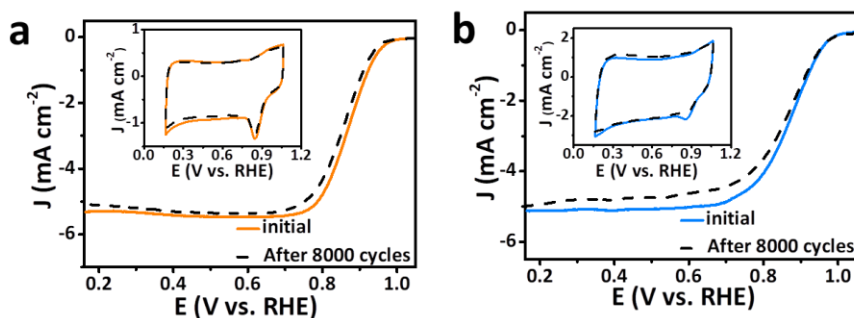

**Supplementary Figure 24:** ORR polarization LSV and CV curves of (a) Fe/N-C and (b) Mn/N-C, measurement before and after 8000 potential cycles at the scan rate of  $50 \text{ mV s}^{-1}$  with the rotation speed of 1600 rpm in 0.1M KOH.

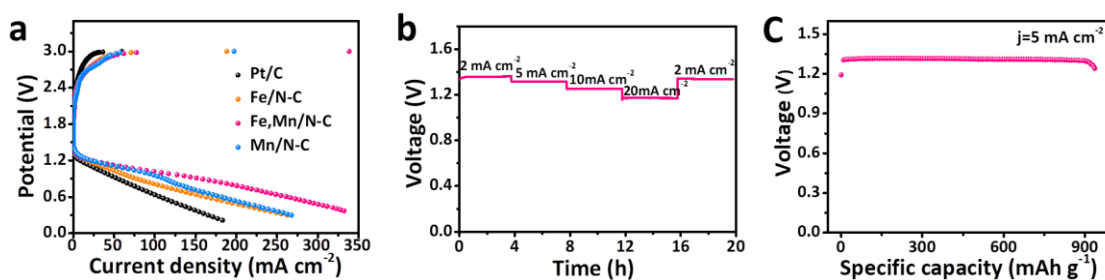

**Supplementary Figure 25:** (a) Charge and discharge polarization curves of Zn-air batteries. (b) Galvanostatic discharge curves of the primary Zn-air battery with Fe,Mn/N-C as catalyst at different current densities, which was normalized to the area of air-cathode. (c) Galvanostatic discharge curves of the primary Zn-air battery with Fe,Mn/N-C as catalyst at  $5 \text{ mA cm}^{-2}$  current densities.



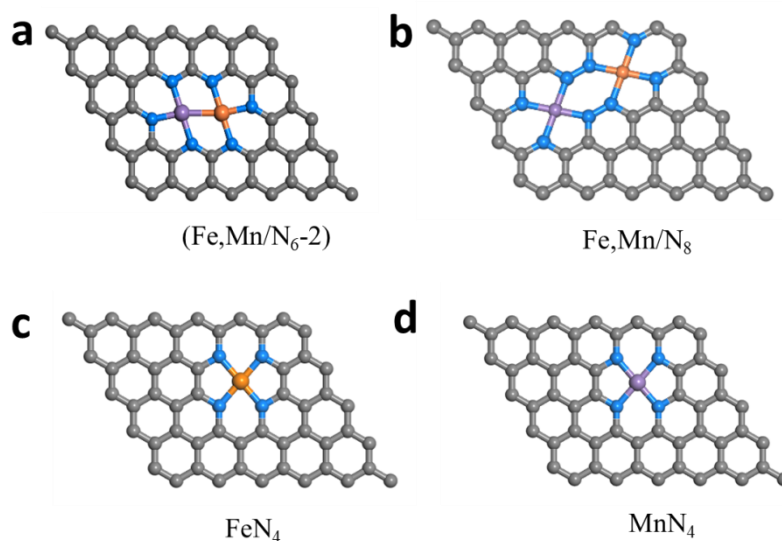

**Supplementary Figure 26:** The optimized structure of different models: Fe,Mn/N<sub>6-2</sub>(a), Fe,Mn/N<sub>8</sub>(b), FeN<sub>4</sub>(c), MnN<sub>4</sub>(d).

Fe,Mn/N<sub>8</sub> includes two models, Fe,Mn/N<sub>8</sub>-a represents ORR active site is Fe, Fe,Mn/N<sub>8</sub>-b represents ORR active site is Mn.

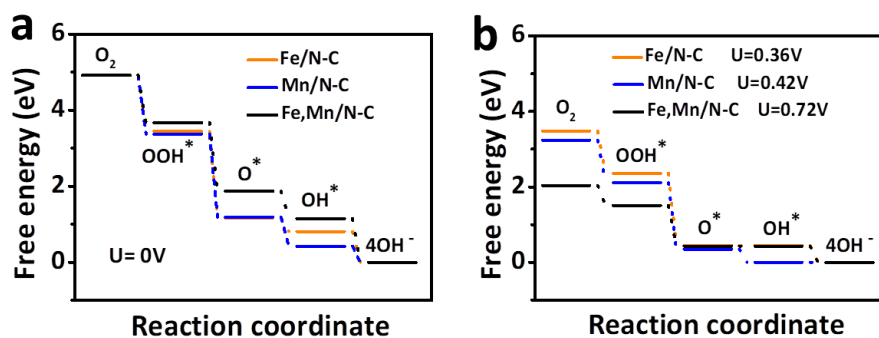

**Supplementary Figure 27:** (a) The Gibbs free-energy path pathways of both four-electron based alkaline ORR at  $U = 0$  V. (b) The pathways for Fe/N-C, Mn/N-C and Fe,Mn/N-C are summarized at  $U = 0.36$  V,  $0.42$  V, and  $0.72$  V, respectively.

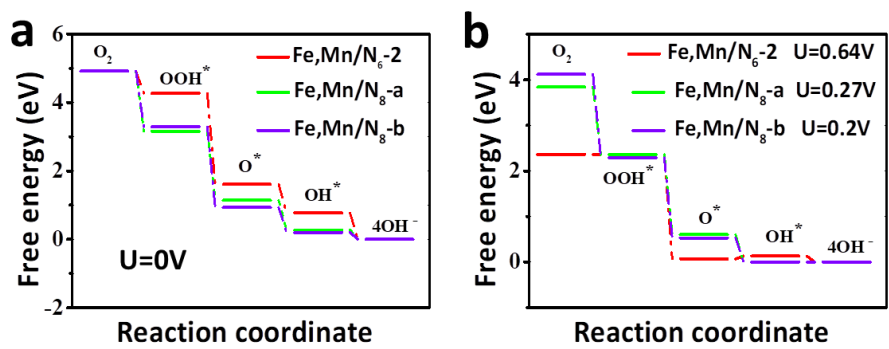

**Supplementary Figure 28:** Free-energy path of ORR for Fe,Mn/N<sub>6</sub>-2 , Fe,Mn/N<sub>8</sub>-a and Fe,Mn/N<sub>8</sub>-b in an alkaline solution.

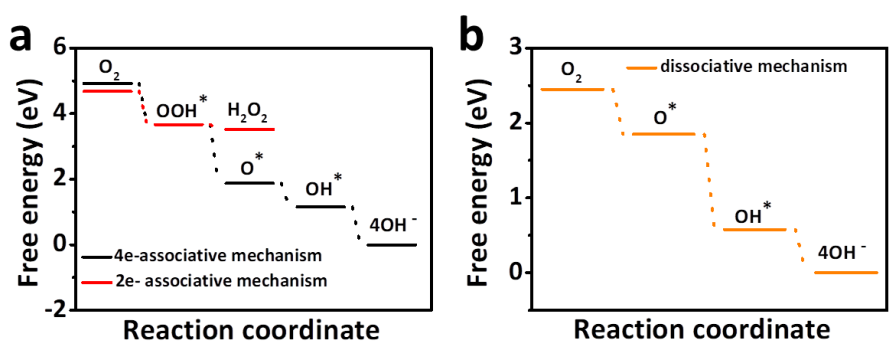

**Supplementary Figure 29:** Free energy diagrams for associative and dissociative mechanisms of Fe,Mn/N<sub>6</sub>-1.

We have considered different reaction pathway (4e- associative mechanism, 2e- associative mechanism and dissociative mechanism) in our pre-calculations. Take Fe,Mn/N<sub>6</sub>-1 as an example, we have made different free energy diagrams for different kinetic mechanisms, and accordingly calculated the theoretical overpotentials. It can be seen that among them, the 4e- associative mechanism possesses the smallest overpotential (0.511 V vs. 0.552 V for 2e- associative mechanism and 0.656 V for dissociative mechanism), namely, it is more likely to happen from the point of thermodynamics. Thus, we only display the most common 4e- associative mechanism in our manuscript.

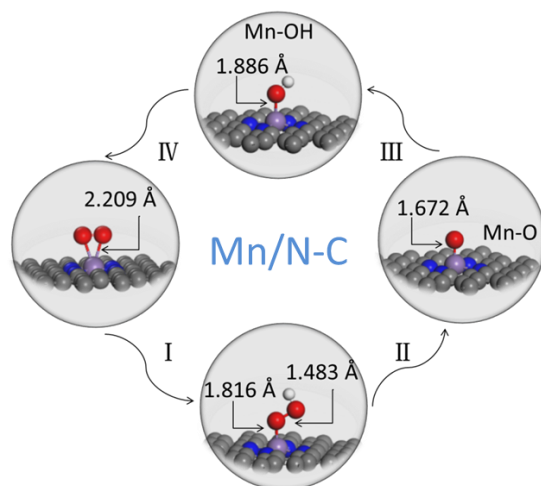

**Supplementary Figure 30:** Optimized atomic structures for the main process of an ORR:

Mn/N-C

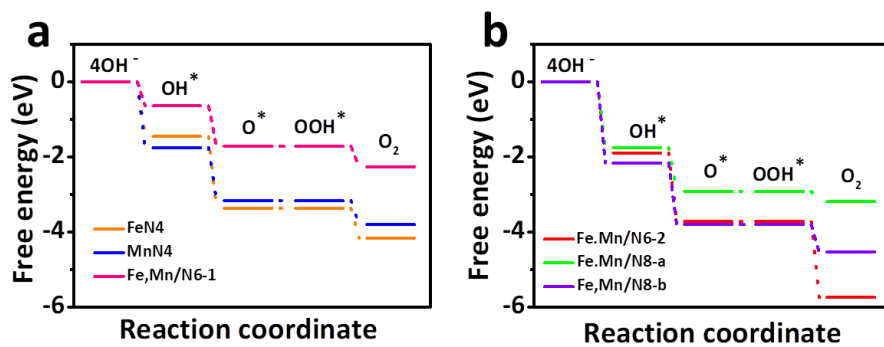

**Supplementary Figure 31:** The Gibbs free-energy path pathways of both four-electron based alkaline OER.

## *Supplementary Tables*

**Supplementary Table 1.** Raman results analysis for the prepared samples .

| Sample Name | Fe,Mn/N-C | Fe/N-C | Mn/N-C |
|-------------|-----------|--------|--------|
| $I_D/I_G$   | 0.94      | 1.01   | 1.03   |

**Supplementary Table 2.** XPS results analysis for the prepared samples (at. %).

| Sample Name | C (at. %) | N (at. %) | O (at. %) | Fe (at. %) | Mn (at. %) |
|-------------|-----------|-----------|-----------|------------|------------|
| Fe,Mn / N-C | 79.8      | 8.66      | 9.82      | 0.06       | 0.05       |
| Fe / N-C    | 80.55     | 4.73      | 12.98     | 0.36       | 0          |
| Mn/N-C      | 74.16     | 9.94      | 14.06     | 0          | 0.15       |

**Supplementary Table 3.** XPS results analysis of high-resolution N 1s spectrum for the prepared samples (at. %).

| Sample Name | pyridinic-N (at. %) | pyrrolic-N (at. %) | graphitic-N (at. %) | pyridinic N <sup>+</sup> -O <sup>-</sup> (at. %) | metal-N (at. %) |
|-------------|---------------------|--------------------|---------------------|--------------------------------------------------|-----------------|
| Fe,Mn / N-C | 33.10               | 26.16              | 17.76               | 6.81                                             | 16.17           |
| Fe / N-C    | 29.22               | 24.68              | 14.26               | 5.13                                             | 26.71           |
| Mn / N-C    | 33.36               | 27.16              | 12.72               | 5.95                                             | 20.77           |

**Supplementary Table 4.** EXAFS fitting parameters at the Mn and Fe K-edge various samples.

| Sample             | Scattering pair | CN            | R(Å)            | $\sigma^2(10^{-3}\text{Å}^2)$ | R factor |
|--------------------|-----------------|---------------|-----------------|-------------------------------|----------|
| Fe in<br>Fe,Mn/N-C | Fe-N1           | $1.8 \pm 0.3$ | $1.97 \pm 0.02$ | $5.7 \pm 0.5$                 | 0.005    |
|                    | Fe-N2           | $2.0 \pm 0.4$ | $2.02 \pm 0.02$ | $6.2 \pm 0.7$                 |          |
|                    | Fe-Mn           | $0.9 \pm 0.2$ | $2.59 \pm 0.03$ | $6.8 \pm 0.5$                 |          |
| Mn in<br>Fe,Mn/N-C | Mn-N1           | $1.9 \pm 0.3$ | $1.95 \pm 0.02$ | $5.3 \pm 0.4$                 | 0.008    |
|                    | Mn-N2           | $2.2 \pm 0.4$ | $2.00 \pm 0.02$ | $5.9 \pm 0.6$                 |          |
|                    | Mn-Fe           | $1.1 \pm 0.2$ | $2.62 \pm 0.03$ | $6.5 \pm 0.7$                 |          |

$S_0^2$  is the amplitude reduction factor; CN is the coordination number; R is interatomic distance (the bond length between central atoms and surrounding coordination atoms);  $\sigma^2$  is Debye-Waller factor (a measure of thermal and static disorder in absorber-scatter distances). R factor is used to value the goodness of the fitting.

Error bounds that characterize the structural parameters obtained by EXAFS spectroscopy were estimated as  $N \pm 20\%$ ;  $R \pm 1\%$ ;  $\sigma^2 \pm 20\%$ ;  $\Delta E_0 \pm 20\%$ .

**Supplementary Table 5.** Summary of the Mossbauer parameters and assignments to different Iron species in Fe,Mn/N-C.

| Fe species | IS<br>(mm s <sup>-1</sup> ) | QS<br>(mm s <sup>-1</sup> ) | Area  | Content (%) |
|------------|-----------------------------|-----------------------------|-------|-------------|
| D1         | 0.993                       | 3.27                        | 8700  | 13.5        |
| D3         | 1.058                       | 2.09                        | 17300 | 27.1        |
| D4         | 0.312                       | 0.654                       | 38000 | 59.4        |

**Supplementary Table 6.** Comparison sample of the as-prepared Fe,Mn/N-C electrocatalysts in 0.1M HClO<sub>4</sub>.

| Catalysts  | Onset Potential (V) | E <sup>1/2</sup> (V vs. RHE) | J <sub>Limiting</sub> (mA cm <sup>-2</sup> ) | J <sub>K</sub> (mA cm <sup>-2</sup> ) |
|------------|---------------------|------------------------------|----------------------------------------------|---------------------------------------|
| Fe,Mn /N-C | 0.989               | 0.804                        | 6.77                                         | 7.75                                  |
| Fe /N-C    | 0.778               | 0.702                        | 5.76                                         | 6.29                                  |
| Mn /N-C    | 0.823               | 0.730                        | 6.07                                         | 7.13                                  |
| Pt/C       | 0.866               | 0.807                        | 5.90                                         | 7.22                                  |

**Supplementary Table 7.** Comparison of ORR catalytic activity between Fe,Mn/N-Cproduct and other well-developed Carbon based ORR electrocatalysts in acidic solution.

| <b>Catalysts</b>      | <b>electrolyte</b>                  | <b><math>E_{1/2}</math>(V)</b> | <b><math>J_{\text{limiting}}</math><br/>(mA<br/>cm<sup>-2</sup>)</b> | <b>Reference</b> |
|-----------------------|-------------------------------------|--------------------------------|----------------------------------------------------------------------|------------------|
| Fe,Mn/N-C             | 0.1M HClO <sub>4</sub>              | 0.804                          | 6.77                                                                 | This work        |
| Mn-N <sub>4</sub>     | 0.5M H <sub>2</sub> SO <sub>4</sub> | 0.8                            | <5                                                                   | 1                |
| Fe <sub>SA</sub> -N-C | 0.1M HClO <sub>4</sub>              | 0.776                          | 5.90                                                                 | 2                |
| FePhen@MOF            | 0.1M HClO <sub>4</sub>              | 0.77                           | <6                                                                   | 3                |
| Fe <sub>2</sub> -N-C  | 0.5M H <sub>2</sub> SO <sub>4</sub> | 0.78                           | <6                                                                   | 4                |
| Cu@Fe-N-C             | 0.5M H <sub>2</sub> SO <sub>4</sub> | 0.761                          | 5.2                                                                  | 5                |
| Fe/OES                | 0.5M H <sub>2</sub> SO <sub>4</sub> | 0.72                           | 5.5                                                                  | 6                |
| Fe-N-C-1              | 0.1M HClO <sub>4</sub>              | 0.74                           | 5.0                                                                  | 7                |
| Zn/Fe-N-C             | 0.1M HClO <sub>4</sub>              | 0.81                           | 5.8                                                                  | 8                |
| Fe SAs/N-C            | 0.1M HClO <sub>4</sub>              | 0.798                          | <6                                                                   | 9                |

**Supplementary Table 8.** Comparison sample of the as-prepared Fe,Mn/N-Celectrocatalysts in 0.1 M KOH.

| <b>Catalysts</b> | <b>Onset Potential (V)</b> | <b>E<sup>1/2</sup> (V vs. RHE)</b> | <b>J<sub>Limiting</sub> (mA cm<sup>-2</sup>)</b> | <b>J<sub>K</sub> (mA cm<sup>-2</sup>)</b> |
|------------------|----------------------------|------------------------------------|--------------------------------------------------|-------------------------------------------|
| <b>Fe,Mn/N-C</b> | 0.979                      | 0.928                              | 5.55                                             | 7.04                                      |
| <b>Fe/N-C</b>    | 0.917                      | 0.872                              | 5.41                                             | 5.74                                      |
| <b>Mn/N-C</b>    | 0.929                      | 0.876                              | 4.68                                             | 6.60                                      |
| <b>Pt/C</b>      | 0.894                      | 0.831                              | 5.12                                             | 7.19                                      |



**Supplementary Table 9.** Comparison of ORR catalytic activity between Fe,Mn/N-C product and other well-developed Carbon based ORR electrocatalysts in alkaline solution.

| Catalysts                    | $E_{1/2}$ (V) | $J_{\text{limiting}}$ (mA cm <sup>-2</sup> ) | Reference |
|------------------------------|---------------|----------------------------------------------|-----------|
| Fe,Mn/N-C                    | 0.928         | 5.55                                         | This work |
| Mn/Fe-HIB-MOF                | 0.883         | 6.37                                         | 10        |
| Fe <sub>SA</sub> -N-C        | 0.891         | 6.0                                          | 2         |
| Zn/Fe-N-C                    | 91            | 5.9                                          | 8         |
| Fe-N <sub>4</sub> SAs/NPC    | 0.885         | 5.5                                          | 11        |
| Mn/C-N                       | 0.86          | 5.3                                          | 12        |
| Fe SAC/N-C                   | 0.89          | 5.6                                          | 13        |
| Fe-ISAs/CN                   | 0.90          | 6.1                                          | 14        |
| Fe SAs/N-C                   | 0.91          | 5.5                                          | 15        |
| SA-Fe-NHPC                   | 0.93          | 6.0                                          | 16        |
| Fe <sub>1</sub> -HNC-500-850 | 0.85          | 5.8                                          | 17        |

**Supplementary Table 10.** The formation energy for the structural models.

| Model                | MnN4  | FeN4  | Fe,Mn/N6-1 | Fe,Mn/N6-2 | Fe,Mn/N8 |
|----------------------|-------|-------|------------|------------|----------|
| Formation energy(eV) | -3.38 | -3.76 | -8.13      | -5.60      | -5.29    |

**Supplementary Table 11.** The calculated total energy (eV) of different supports and O, OH, OOH adsorbed on different active sites.

| Active sites                         | E (support)   | E(OH*)        | E(O*)         | E(OOH*)       |
|--------------------------------------|---------------|---------------|---------------|---------------|
| MnN <sub>4</sub>                     | -654.515      | -665.1460989  | -660.74227269 | -669.62659395 |
| FeN <sub>4</sub>                     | -653.34816337 | -663.63744123 | -659.55725226 | -668.36721095 |
| Fe,Mn/N <sub>6</sub> -1              | -642.28483595 | -652.22323442 | -647.83087899 | -657.10386515 |
| Fe,Mn/N <sub>6</sub> -2              | -652.22864543 | -662.5056048  | -658.03911335 | -666.43719503 |
| Fe,Mn/N <sub>8</sub> -a<br>(Fe site) | -878.95803849 | -889.78169965 | -885.20099546 | -894.2525772  |
| Fe,Mn/N <sub>8</sub> -b<br>(Mn site) |               | -889.81317513 | -885.45183983 | -894.15376072 |

**Supplementary Table 12.** The calculated free energy (eV) for the 4-electron transfer processes during ORR at different reaction coordinations. The applied potential  $U=0$  V.

| Models                               | $O_2+2H_2O$ | $OH^-+H_2O+*OOH$ | $2OH^-+*O+H_2O$ | $3OH^-+OH^*$ | $4OH^-$ | onset potential (V) |
|--------------------------------------|-------------|------------------|-----------------|--------------|---------|---------------------|
| MnN <sub>4</sub>                     | 4.92        | 3.373            | 1.194           | 0.422        | 0       | 0.422               |
| FeN <sub>4</sub>                     | 4.92        | 3.445            | 1.174           | 0.811        | 0       | 0.364               |
| Fe,Mn/N <sub>6</sub> -1              | 4.92        | 3.668            | 1.873           | 1.154        | 0       | 0.719               |
| Fe,Mn/N <sub>6</sub> -2              | 4.92        | 4.277            | 1.611           | 0.776        | 0       | 0.644               |
| Fe,Mn/N <sub>8</sub> -a<br>(Fe site) | 4.92        | 3.169            | 1.141           | 0.276        | 0       | 0.276               |
| Fe,Mn/N <sub>8</sub> -b<br>(Mn site) | 4.92        | 3.289            | 0.927           | 0.198        | 0       | 0.198               |

**Supplementary Table 13.** The limiting overpotential for the structural models.

| Model              | MnN <sub>4</sub> | FeN <sub>4</sub> | Fe,Mn/N <sub>6</sub><br>-1 | Fe,Mn/N <sub>6</sub><br>-2 | Fe,Mn/N <sub>8</sub><br>(Fe) | Fe,Mn/N <sub>8</sub><br>(Mn) |
|--------------------|------------------|------------------|----------------------------|----------------------------|------------------------------|------------------------------|
| Overpotential (eV) | 0.81             | 0.87             | 0.51                       | 0.59                       | 0.95                         | 1.03                         |

**Supplementary Table 14.** The calculated vibrational frequencies of O, OH and OOH adsorbed on the support. The corresponding energy of ZPE-TS (ZPE: zero-point energy, T: temperature (300K), S: entropy) are also listed.

|      | Frequencies (meV)                                              | ZPE-TS (eV) |
|------|----------------------------------------------------------------|-------------|
| O*   | 27.96, 34.74, 78.77                                            | 0.021       |
| OH*  | 10.98, 23.47, 52.21, 53.82, 102.94, 457.36                     | 0.248       |
| OOH* | 8.69, 15.18, 24.64, 24.82, 34.67, 60.88, 83.22, 151.69, 454.15 | 0.245       |

**Supplementary Table 15.** The calculated free energy (eV) for the 4 electron transfer processes during OER at different reaction coordinations.

| Models                            | 4OH <sup>-</sup> | 3OH <sup>-</sup> +OH* | 2OH <sup>-</sup> +*O+H <sub>2</sub> O | OH <sup>-</sup> +H <sub>2</sub> O+*OOH | O <sub>2</sub> +2H <sub>2</sub> O | onset potential (V) |
|-----------------------------------|------------------|-----------------------|---------------------------------------|----------------------------------------|-----------------------------------|---------------------|
| MnN <sub>4</sub>                  | 0                | 1.7576                | 3.1646                                | 3.1646                                 | 3.7968                            | 2.1792              |
| FeN <sub>4</sub>                  | 0                | 1.4595                | 3.3661                                | 3.3661                                 | 4.1608                            | 2.2702              |
| Fe,Mn/N <sub>6</sub> -1           | 0                | 0.6412                | 1.717                                 | 1.717                                  | 2.26                              | 1.795               |
| Fe,Mn/N <sub>6</sub> -2           | 0                | 1.8895                | 3.7206                                | 3.7206                                 | 5.7428                            | 2.6657              |
| Fe,Mn/N <sub>8</sub> -a (Fe site) | 0                | 1.7522                | 2.917                                 | 2.917                                  | 3.194                             | 2.0285              |
| Fe,Mn/N <sub>8</sub> -b (Mn site) | 0                | 2.1639                | 3.797                                 | 3.797                                  | 4.528                             | 2.362               |

## References

- 1 Li, J. *et al.* Atomically dispersed manganese catalysts for oxygen reduction in proton-exchange membrane fuel cells. *Nat. Catal.* **1**, 935-945 (2018).
- 2 Jiao, L. *et al.* From Metal-Organic Frameworks to Single-Atom Fe Implanted N-doped Porous Carbons: Efficient Oxygen Reduction in Both Alkaline and Acidic Media. *Angew. Chem. Int. Ed.* **57**, 8525-8529 (2018).
- 3 Strickland, K. *et al.* Highly active oxygen reduction non-platinum group metal electrocatalyst without direct metal-nitrogen coordination. *Nat. Commun.* **6**, 7343 (2015).
- 4 Ye, W. *et al.* Precisely tuning the number of Fe atoms in clusters on N-doped carbon toward acidic oxygen reduction reaction. *Cell Press: Chem.* **5**, 2865-2878 (2019).
- 5 Wang, Z. *et al.* Fe, Cu - Coordinated ZIF - Derived Carbon Framework for Efficient Oxygen Reduction Reaction and Zinc–Air Batteries. *Adv. Funct. Mater.* **28**, 1802596 (2018).
- 6 Hou, C. C. *et al.* Single-Atom Iron Catalysts on Overhang-Eave Carbon Cages for High-Performance Oxygen Reduction Reaction. *Angew. Chem. Int. Ed.* **59**, 7384-7389 (2020).
- 7 Li, J. *et al.* Ultrahigh-Loading Zinc Single-Atom Catalyst for Highly Efficient Oxygen Reduction in Both Acidic and Alkaline Media. *Angew. Chem. Int. Ed.* **58**, 7035-7039 (2019).

- 8 Xiao, F. *et al.* Nitrogen-coordinated single iron atom catalysts derived from metal organic frameworks for oxygen reduction reaction. *Nano Energy* **61**, 60-68 (2019).
- 9 Yang, Z. *et al.* Boosting Oxygen Reduction Catalysis with Fe-N<sub>4</sub> Sites Decorated Porous Carbons toward Fuel Cells. *ACS Catal.* **9**, 2158-2163 (2019).
- 10 Shinde, S. S. *et al.* Unveiling dual-linkage 3D hexaiminobenzene metal-organic frameworks towards long-lasting advanced reversible Zn-air batteries. *Energy Environ. Sci.* **12**, 727-738 (2019).
- 11 Pan, Y. *et al.* A Bimetallic Zn/Fe Polyphthalocyanine-Derived Single-Atom Fe-N<sub>4</sub> Catalytic Site: A Superior Trifunctional Catalyst for Overall Water Splitting and Zn-Air Batteries. *Angew. Chem. Int. Ed.* **57**, 8614-8618 (2018).
- 12 Yang, Y. *et al.* O-, N-Atoms-Coordinated Mn Cofactors within a Graphene Framework as Bioinspired Oxygen Reduction Reaction Electrocatalysts. *Adv. Mater.* **30**, e1801732 (2018).
- 13 Lin, Y. *et al.* Fabricating Single-Atom Catalysts from Chelating Metal in Open Frameworks. *Adv. Mater.* **31**, e1808193 (2019).
- 14 Chen, Y. *et al.* Isolated Single Iron Atoms Anchored on N-Doped Porous Carbon as an Efficient Electrocatalyst for the Oxygen Reduction Reaction. *Angew. Chem. Int. Ed.* **56**, 6937-6941 (2017).
- 15 Cheng, W. *et al.* Boosting defective carbon by anchoring well-defined atomically dispersed metal-N<sub>4</sub> sites for ORR, OER, and Zn-air batteries. *Appl. Catal., B* **260**, 118198 (2020).

- 16 Chen, G. *et al.* Zinc-Mediated Template Synthesis of Fe-N-C Electrocatalysts with Densely Accessible Fe-N<sub>x</sub> Active Sites for Efficient Oxygen Reduction. *Adv. Mater.* **32**, e1907399 (2020).
- 17 Zhang, X. *et al.* A General Method for Transition Metal Single Atoms Anchored on Honeycomb-Like Nitrogen-Doped Carbon Nanosheets. *Adv. Mater.* **32**, e1906905 (2020).
